# Supplementary material for: Real-world validity of randomized controlled phase III trials in newly diagnosed glioblastoma: to whom do the results of the trials apply?
Source: PubMed Central journal article supplement (PMC7914075; doi:10.1093/noajnl/vdab008), 2021-02-26
Supplement: vdab008_suppl_supplementary_figures_and_tables.pdf [file vdab008_suppl_supplementary_figures_and_tables.pdf]

# Supplementary Table S1

| Criteria for study enrollment          |                                                                         | Clinical trial | Gilbert       | Gilbert        | Chinot         | Stupp                     | Westphal      | Stupp          | Kong                 | Weller                      | Liau          | Herringer                 |
|----------------------------------------|-------------------------------------------------------------------------|----------------|---------------|----------------|----------------|---------------------------|---------------|----------------|----------------------|-----------------------------|---------------|---------------------------|
|                                        |                                                                         |                | JCO<br>(2013) | NEJM<br>(2014) | NEJM<br>(2014) | Lancet<br>(2014)          | EJC<br>(2015) | JAMA<br>(2017) | Oncotarget<br>(2017) | Lancet Oncol.<br>(2017)     | JTM<br>(2018) | Lancet<br>(2019)          |
| Age                                    | 18-70                                                                   |                |               |                | §              | ●                         |               | ●              | §                    | ●                           | ●             |                           |
|                                        | ≥ 18                                                                    | ●              | ●             | ●              | ●              |                           | ●             |                | ●                    |                             |               |                           |
| Performance status                     | ECOG 0-2<br>*ECOG 0-1 only                                              |                |               | ●              | *              |                           |               |                | ●                    |                             |               |                           |
|                                        | KPS ≥ 70<br>*KPS ≥ 60                                                   | *              | ●             | ●              |                | ●                         | ●             | *              |                      | ●                           | ●             |                           |
| Physiology                             | Adequate hematologic, hepatic & renal function<br>*Adequate coagulation | ●              | ●             | *              | ●              | ●                         | ●             | *              | ●                    | ●                           | *             |                           |
| Pathology                              | Newly diagnosed glioblastoma<br>*Specify supratentorial                 | *              | ●             | *              | *              | ●                         | ●             | *              | ●                    | *                           | ●             |                           |
| Treatment                              | Bopsy/resection<br>*Resection required                                  | ●              | *             | ●              | ●              | ●                         | ●             | ●              | ●                    | *                           | *             | ●                         |
|                                        | RT/TMZ<br>#Planned for 60Gy/TMZ<br>*Completed RT/TMZ                    | *              | #             | #              | #              | #                         | #             | *              | #                    | *                           | *             | #                         |
| Glucocorticoids                        | Stable or decreasing doses                                              | ●              | ●             | ●              | ●              |                           |               |                |                      | ●                           |               | ●                         |
| Study specific criteria for enrollment | E.g. molecular stratification                                           |                |               |                |                | MGMT methylated GBMs only |               |                |                      | EGFRvIII positive GBMs only |               | MGMT methylated GBMs only |
| Disease status                         | Progressive disease before randomization                                | ●              | ●             | ●              | ●              |                           |               |                |                      | ●                           | ●             |                           |
| Disqualifying comorbidities            | E.g. active heart, lung, hepatic, renal disease, other malignancy etc.  | ●              | ●             | ●              | ●              |                           | Not described | ●              | ●                    | ●                           | ●             | ●                         |

| Time of randomization | After completion of concurrent RT/TMZ | Randomization after 3 weeks (midway) into RT/TMZ | Before start of concurrent RT/TMZ | Before start of concurrent RT/TMZ | Before start of concurrent RT/TMZ | After completion of concurrent RT/TMZ | Before start of concurrent RT/TMZ | After completion of concurrent RT/TMZ | After completion of concurrent RT/TMZ | Before start of concurrent RT/TMZ |
|-----------------------|---------------------------------------|--------------------------------------------------|-----------------------------------|-----------------------------------|-----------------------------------|---------------------------------------|-----------------------------------|---------------------------------------|---------------------------------------|-----------------------------------|
|                       |                                       |                                                  |                                   |                                   |                                   |                                       |                                   |                                       |                                       |                                   |

- Inclusion criteria for enrollment trials
- Inclusion criteria used in a minority of trials investigating specific molecular subgroup (not considered a criteria in this study)
- Exclusion criteria for enrollment in trials

§ The trials do not report an upper age limit as an inclusion criterion, however, the patient characteristics do not describe any patients above 70 years (the reported median age and ranges < 70 years), and they do not describe any data for patients > 70 years in the article nor supplementary material.

## Supplementary Table S2

|                     | No RT/no TMZ |                         | RT (any dose)/no TMZ |                         | RT (any dose) /discontinued TMZ |                         | Completed RT/TMZ |                         | Total (%)                 |
|---------------------|--------------|-------------------------|----------------------|-------------------------|---------------------------------|-------------------------|------------------|-------------------------|---------------------------|
|                     | Number (%)   | Median survival, months | Number (%)           | Median survival, months | Number (%)                      | Median survival, months | Number (%)       | Median survival, months |                           |
| No surgery          | 16 (3.1)     | 1.7                     | 6 (1.1)              | 3.4                     | 4 (0.8)                         | 6.4                     | 2 (0.4)          | 8.6                     | 28 (5.5)                  |
| Stereotactic biopsy | 8 (1.6)      | 1.6                     | 5 (1.0)              | 2.7                     | 7 (1.4)                         | 5.5                     | 18 (3.5)         | 8.5                     | 38 (7.4)                  |
| Open biopsy         | 6 (1.2)      | 0.9                     | 6 (1.2)              | 6.0                     | 5 (1.0)                         | 6.5                     | 16 (3.5)         | 10.7                    | 33 (6.4)                  |
| Resection           | 22 (4.3)     | 1.1                     | 47 (9.2)             | 8.2                     | 39 (7.6)                        | 9.3                     | 302 (59.0)       | 15.6                    | 410 (80.1)                |
| Total (%)           | 52 (10.2)    | 1.3                     | 64 (12.5)            | 6.7                     | 55 (10.7)                       | 8.0                     | 338 (66.0)       | 14.8                    | 509* (99.4%) <sup>a</sup> |

## Supplementary Table S3

| Criterion                             | 1) Before RT/TMZ (n=excluded) | 2) Midway through RT/TMZ (n=excluded) | 3) At the end of RT/TMZ (n=excluded) |
|---------------------------------------|-------------------------------|---------------------------------------|--------------------------------------|
| Age 18-70                             | 136                           | 136                                   | 136                                  |
| Supratentorial GBM                    | 17                            | 17                                    | 17                                   |
| Open biopsy/resection                 | 29                            | 29                                    | 29                                   |
| No disqualifying comorbidities        | 72                            | 72                                    | 72                                   |
| Planned further oncological treatment | 23                            | 23                                    | 23                                   |
| No progression during RT/TMZ          | Not applicable                | 4                                     | 5                                    |
| Completed RT/TMZ                      | Not applicable                | Not applicable                        | 12                                   |
| ECOG $\leq 2$                         | 5                             | 6                                     | 3                                    |
| Stable/no steroids                    | 8                             | 11                                    | 6                                    |
| Adequate blood levels                 | 0                             | 2                                     | 17                                   |
| Total excluded patients (%)           | 290 (57%)                     | 300 (59%)                             | 320 (63%)                            |

# Supplementary Figure S1

A

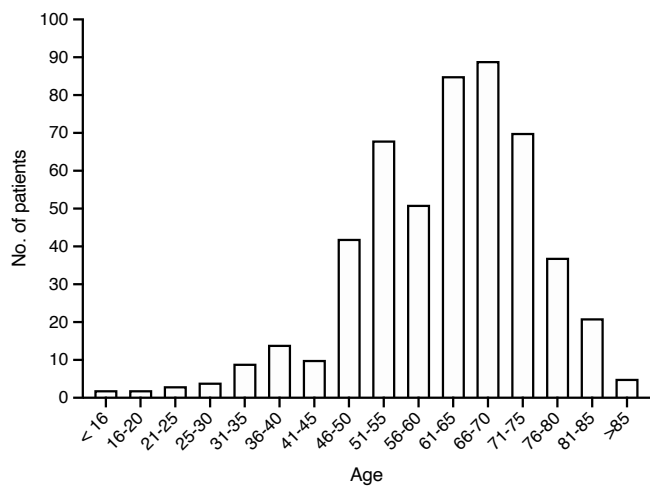

B

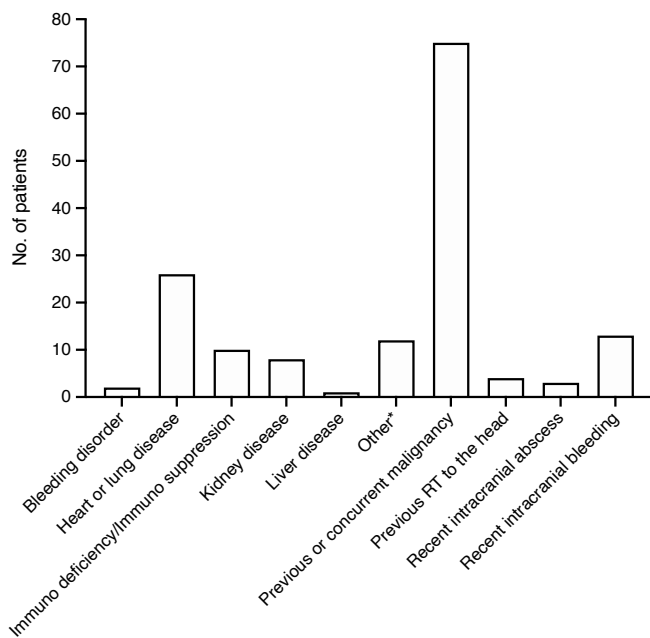

\*Diagnoses within the category: dementia, congenital intellectual disability, severe psychiatric disorder, downs syndrome. Also one patient that was pregnant.

C

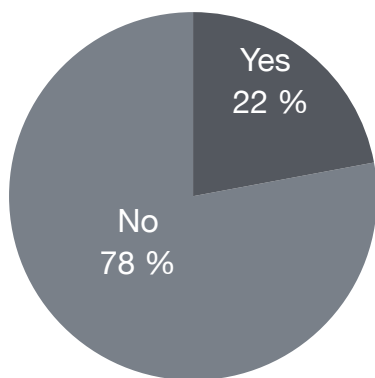

|              | Number (%) | Median age (range) in years | Median survival (95% CI) in months |
|--------------|------------|-----------------------------|------------------------------------|
| Polypharmacy |            |                             |                                    |
| Yes          | 113 (22.0) | 69 (37-85)                  | 10.1 (8.1-11.9)                    |
| No           | 399 (78.0) | 61 (10-97)                  | 12.1 (11.1-13.3)                   |
